# Supplementary material
Source: publisher site journal article supplement (https://www.dovepress.com/article/594224)
Supplement: Supplementary file 1 [file 594224%20Revised%20Supplementary%20Material.docx]

**Supplementary Material**

The UPLC‑QTOF‑MS parameters for both positive and negative ion modes were as follows: ion spray voltage, 5500 V; collision energy, 35 ± 15 V; ion source temperature, 550 °C. Chromatographic separation was performed on a Phenomenex Kinetex XB‑C18 column (2.6 μm, 100 × 2.1 mm). The mobile phase consisted of water containing 0.1% formic acid (A) and methanol (B), delivered at a flow rate of 0.4 mL/min. The gradient elution program was: 0–3 min, 5% B; 3–28 min, 5%–95% B; 28–40 min, 95% B; 40–41 min, 5% B; 41–45 min, 5% B. Detailed parameters are also provided in the Methods section of the main text.


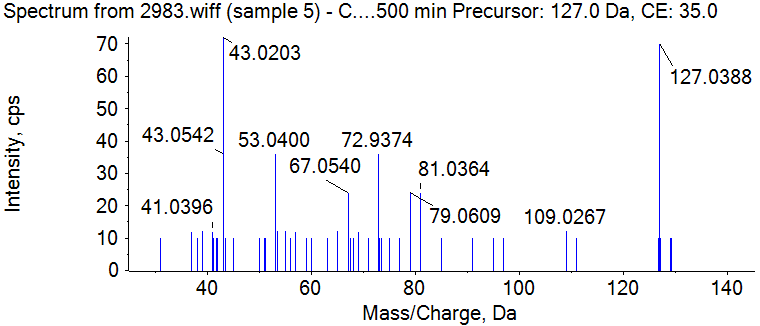


**Supplementary Figure S1.** Mass spectrum of Maltol


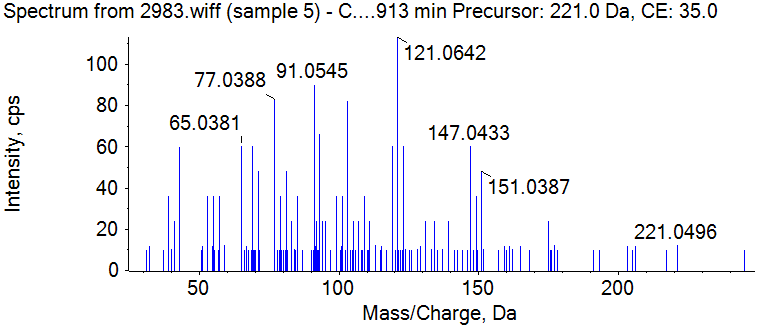


**Supplementary Figure S2.** Mass spectrum of Syringic acid


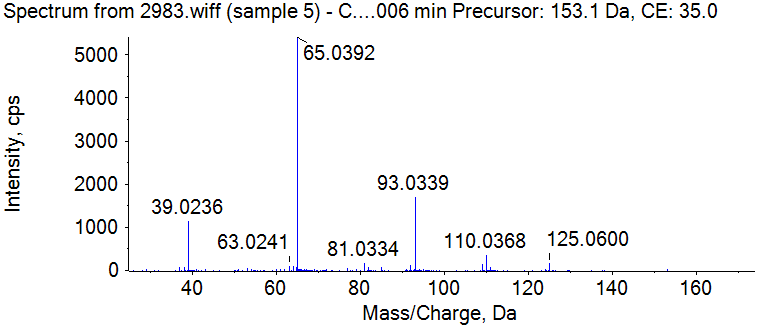


**Supplementary Figure S3.** Mass spectrum of Vanillin


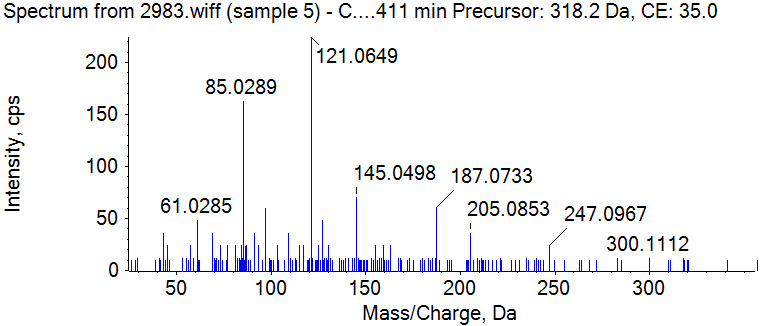


**Supplementary Figure S4.** Mass spectrum of Salidroside


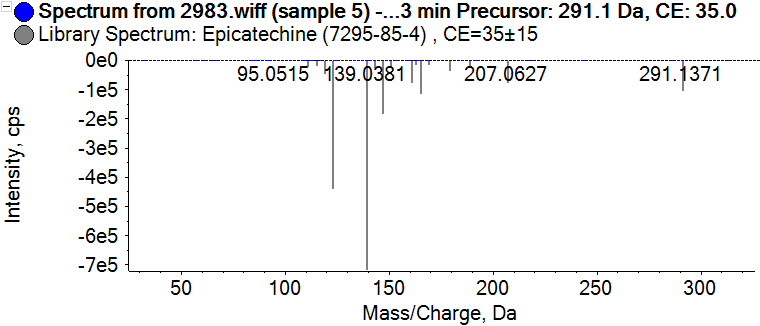


**Supplementary Figure S5.** Mass spectrum of Catechin


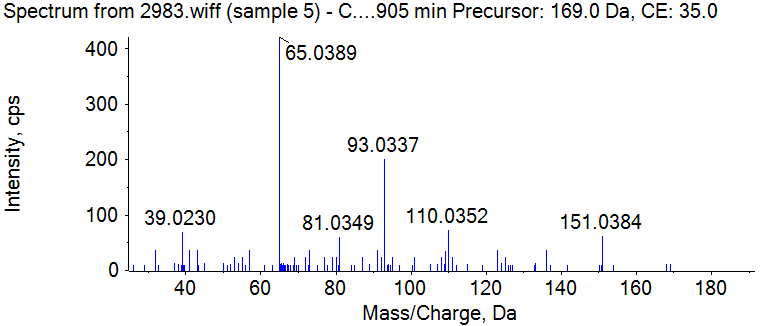


**Supplementary Figure S6.** Mass spectrum of Vanillic acid


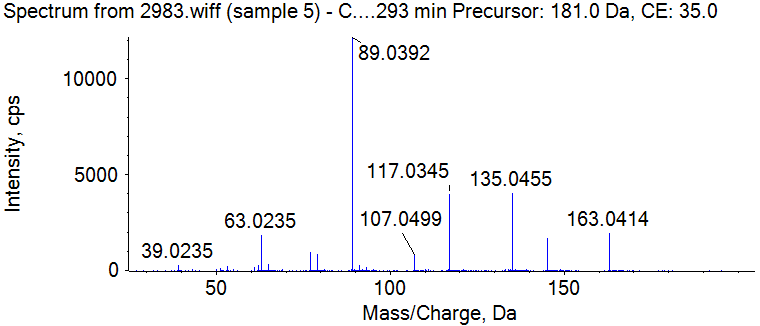


**Supplementary Figure S7.** Mass spectrum of Caffeic Acid


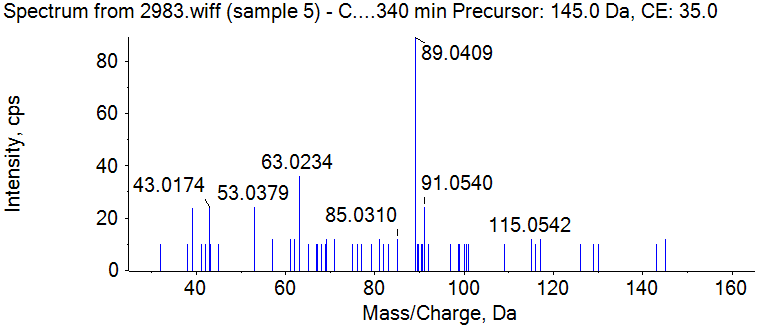


**Supplementary Figure S8.** Mass spectrum of Benzoic acid


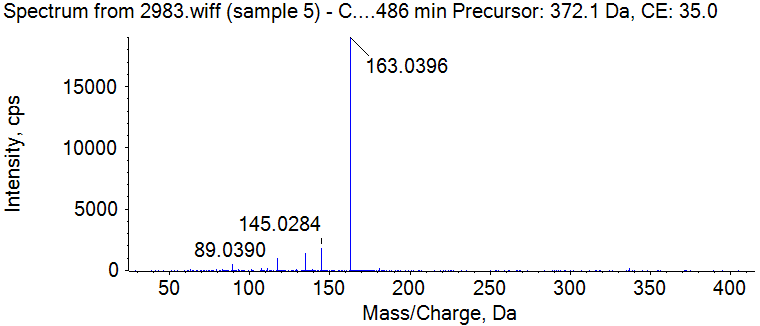


**Supplementary Figure S9.** Mass spectrum of Chlorogenic Acid


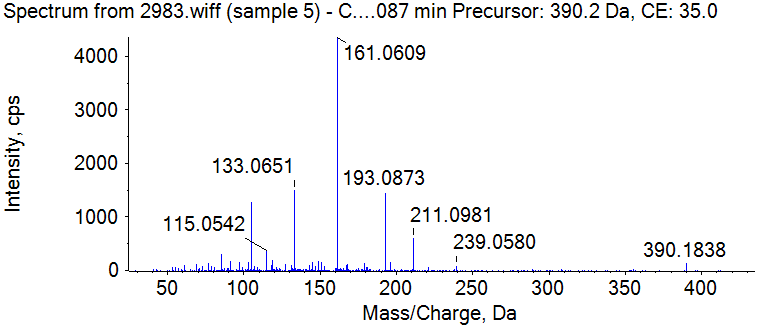


**Supplementary Figure S10.** Mass spectrum of syringin


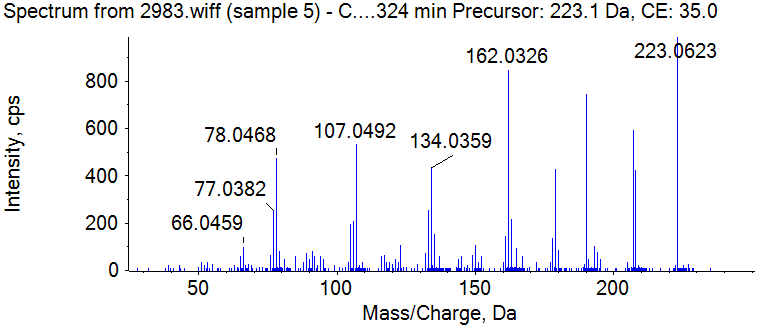


**Supplementary Figure S11.** Mass spectrum of Isofraxidin


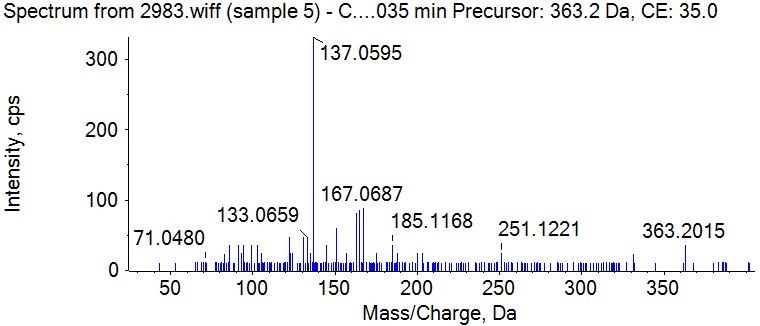


**Supplementary Figure S12.** Mass spectrum of Secoisolariciresinol


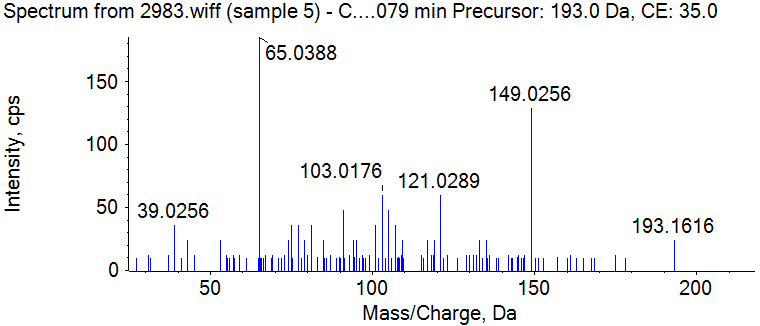


**Supplementary Figure S13.** Mass spectrum of Scopoletin


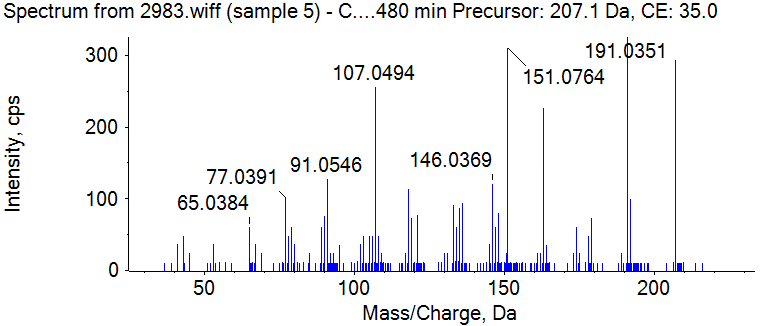


**Supplementary Figure S14.** Mass spectrum of Scoparone


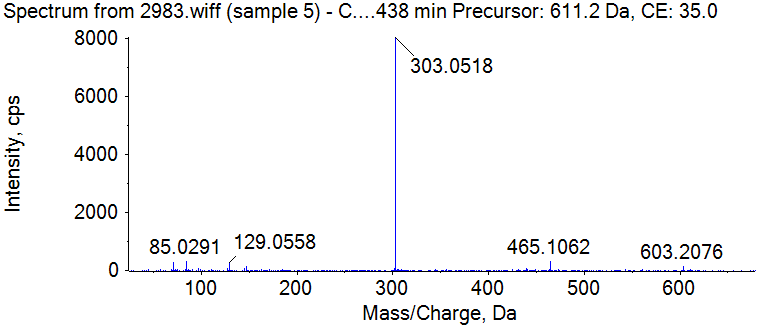


**Supplementary Figure S15.** Mass spectrum of Rutin


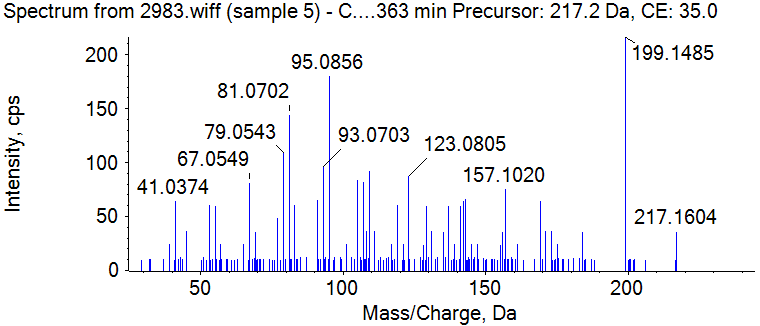


**Supplementary Figure S16.** Mass spectrum of ferulic acid


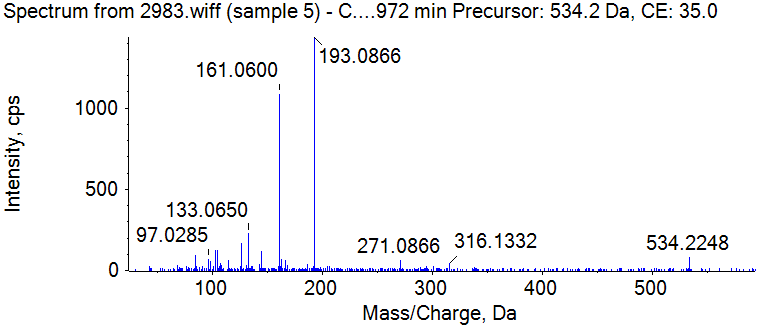


**Supplementary Figure 1-17.** Mass spectrum of Gomisin D


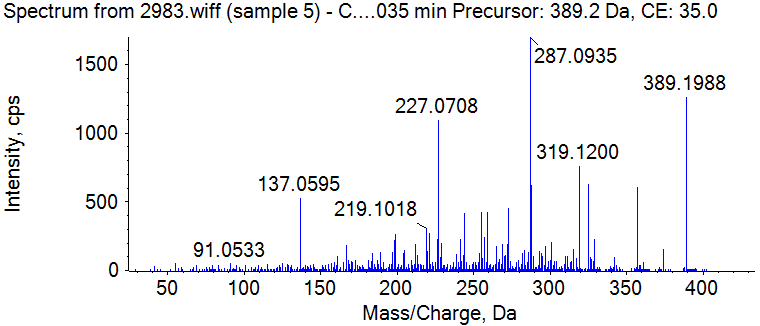


**Supplementary Figure S18.** Mass spectrum of Gomisin J


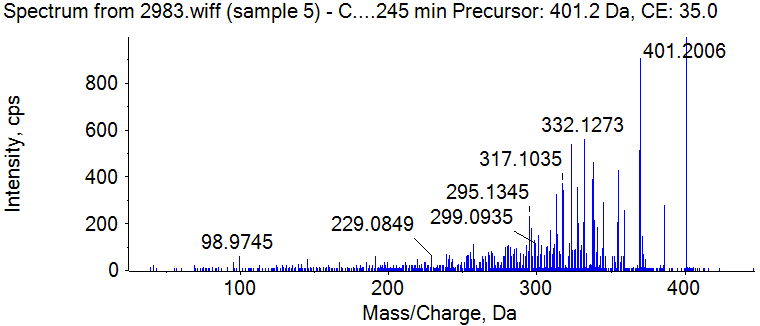


**Supplementary Figure S19.** Mass spectrum of Schisandrin B


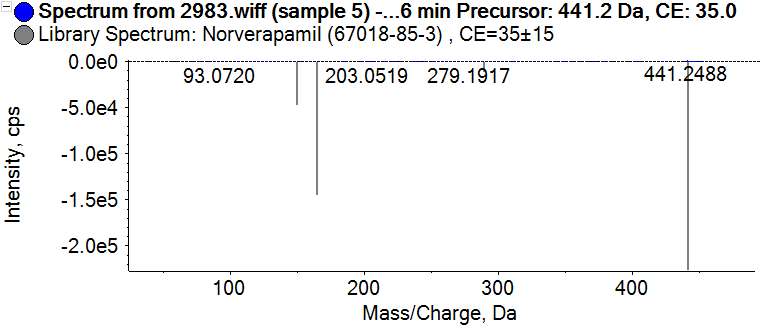


**Supplementary Figure S20.** Mass spectrum of Gomisin H


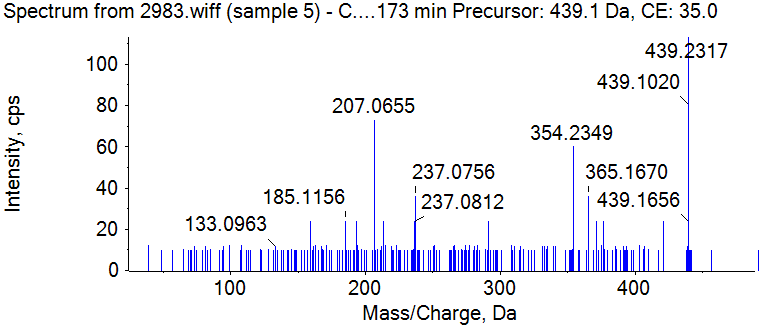


**Supplementary Figure S21.** Mass spectrum of Puerarin


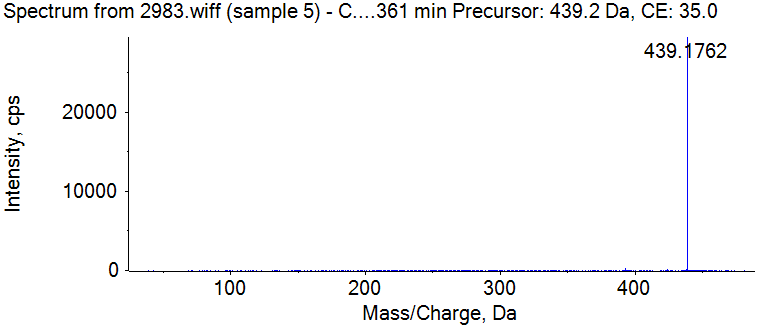


**Supplementary Figure S22.** Mass spectrum of Magnolin


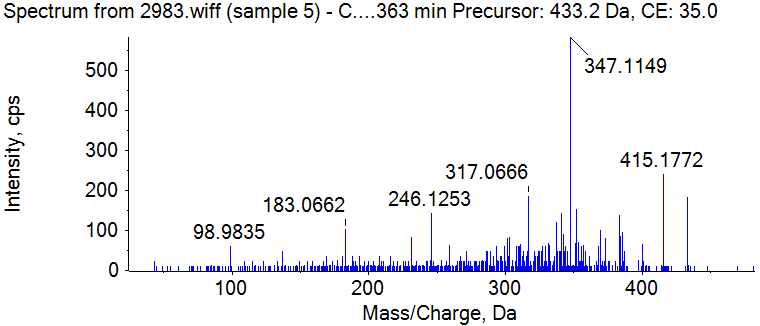


**Supplementary Figure S23.** Mass spectrum of Schizandrin


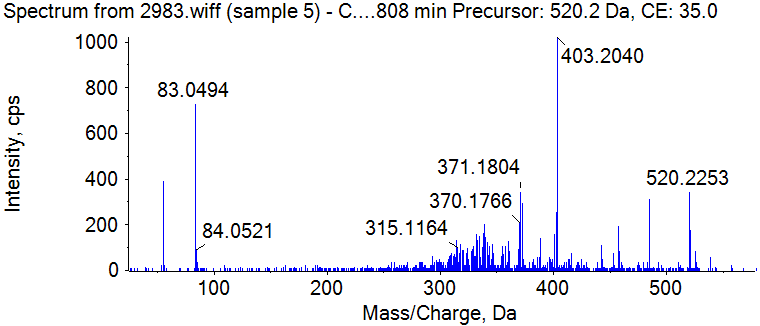


**Supplementary Figure S24.** Mass spectrum of Benzoylgomisin O


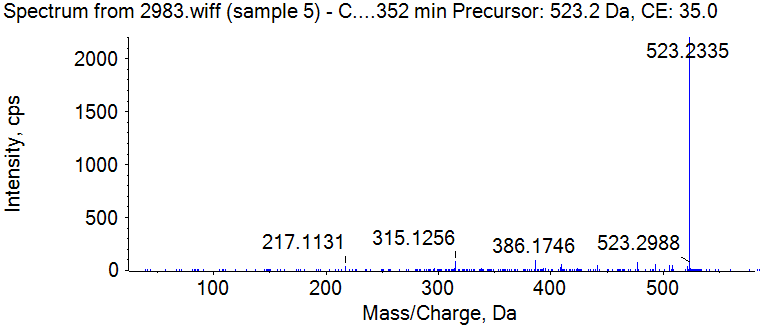


**Supplementary Figure S25.** Mass spectrum of Angeloylgomisin H


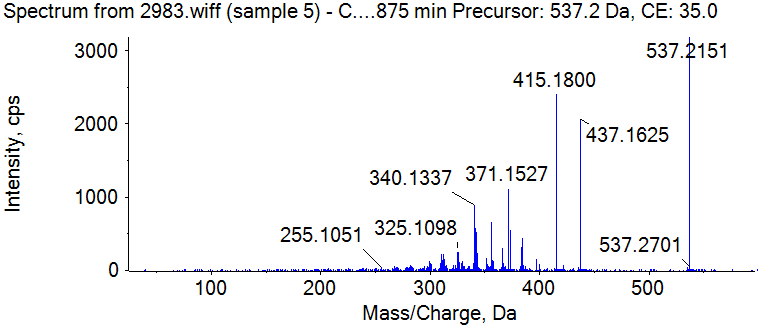


**Supplementary Figure S26.** Mass spectrum of Gomisin G


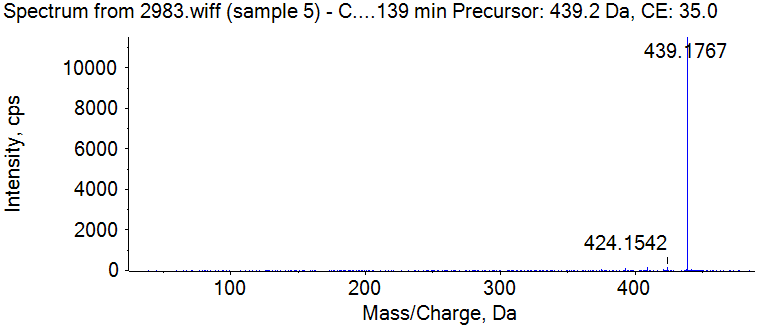


**Supplementary Figure S27.** Mass spectrum of Gomisin O


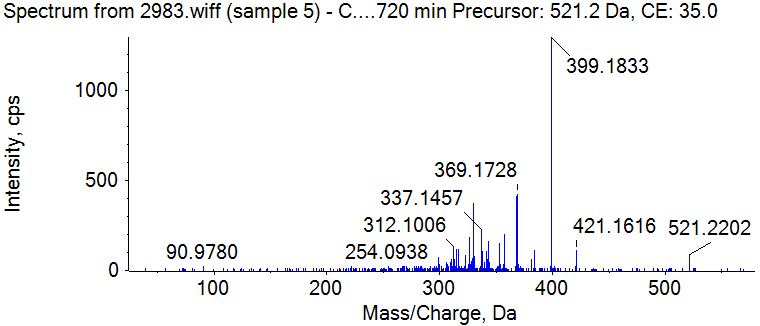


**Supplementary Figure S28.** Mass spectrum of Angeloylgomisin O


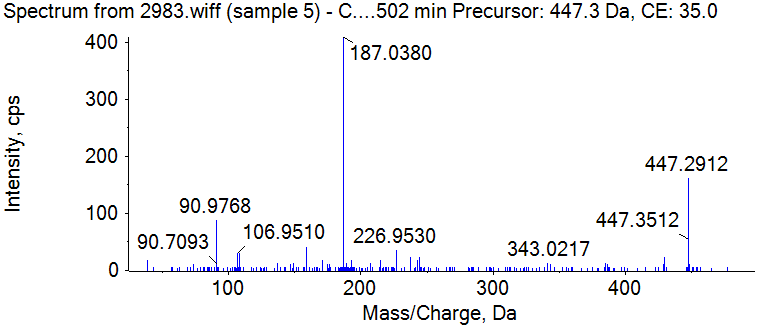


**Supplementary Figure S29.** Mass spectrum of Stearic acid


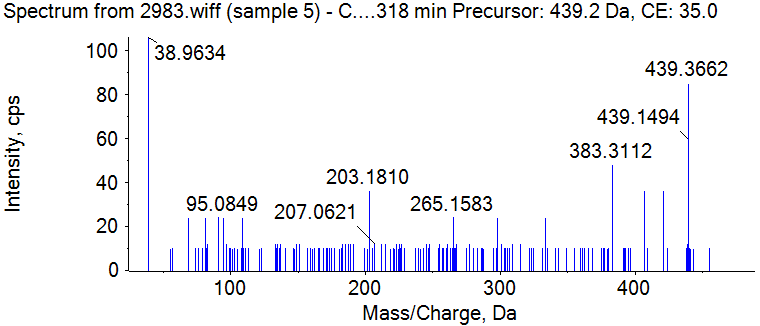


**Supplementary Figure S30.** Mass spectrum of Ursolic acid


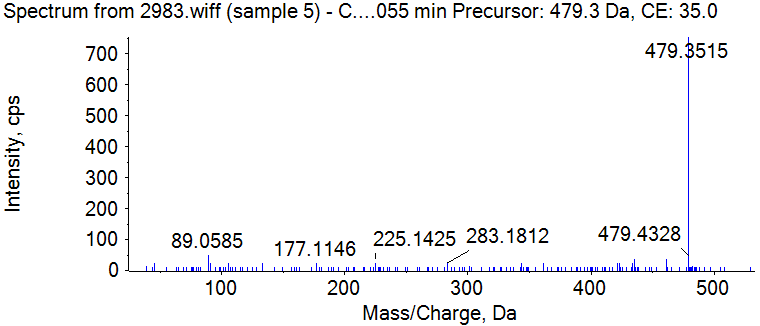


**Supplementary Figure S31.** Mass spectrum of oleanolic acid


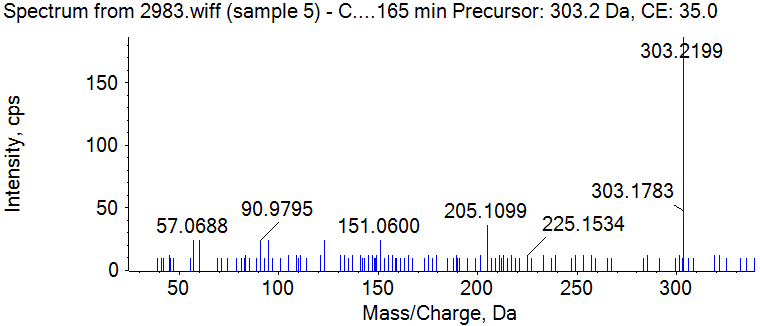


**Supplementary Figure S32.** Mass spectrum of Linoleic acid


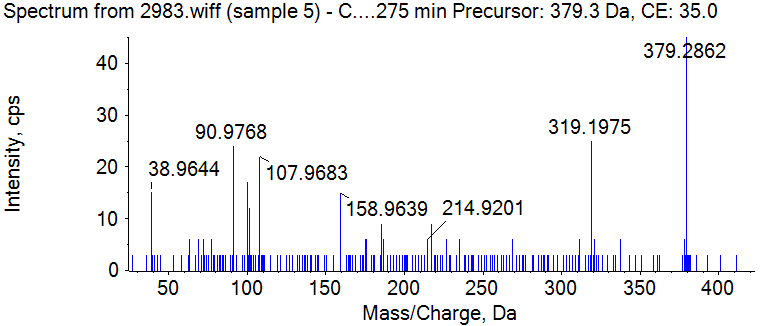


**Supplementary Figure S33.** Mass spectrum of Ergosterol


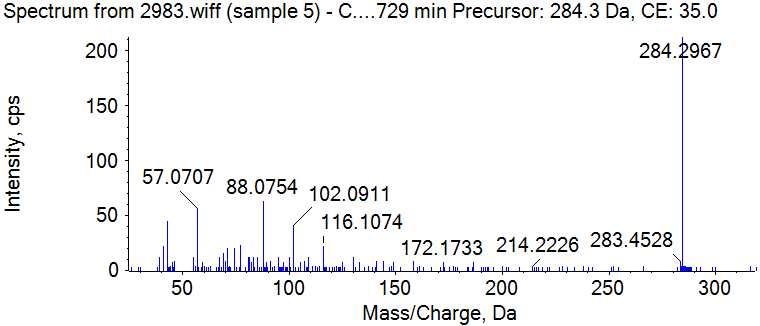


**Supplementary Figure S34.** Mass spectrum of Stearamide


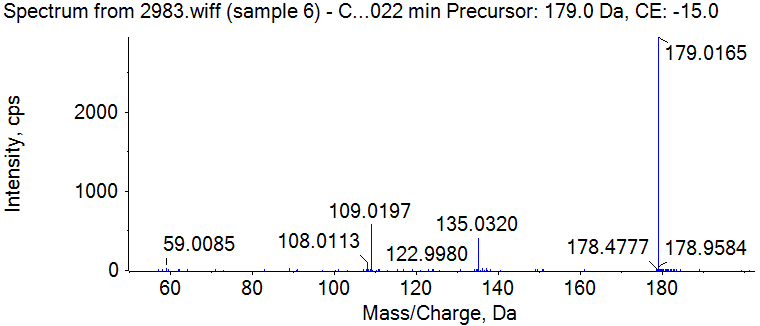


**Supplementary Figure S35.** Mass spectrum of Caffeic Acid


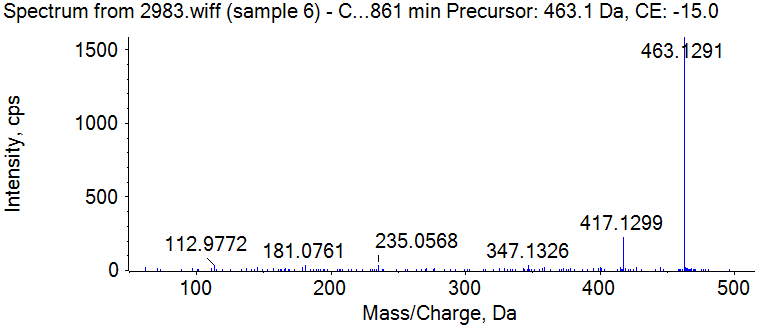


**Supplementary Figure S36.** Mass spectrum of Isoquercitrin


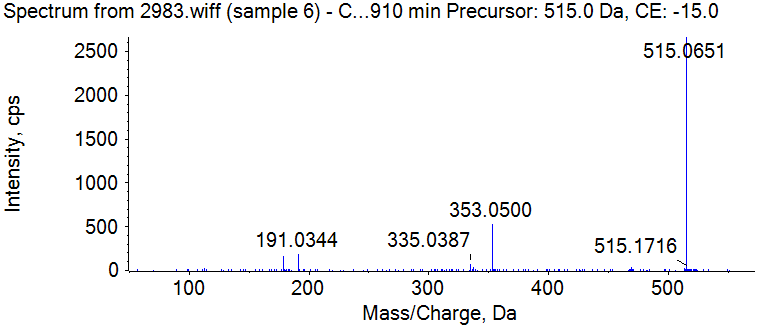


**Supplementary Figure S37.** Mass spectrum of 1,3-Dicaffeoylquinic acid


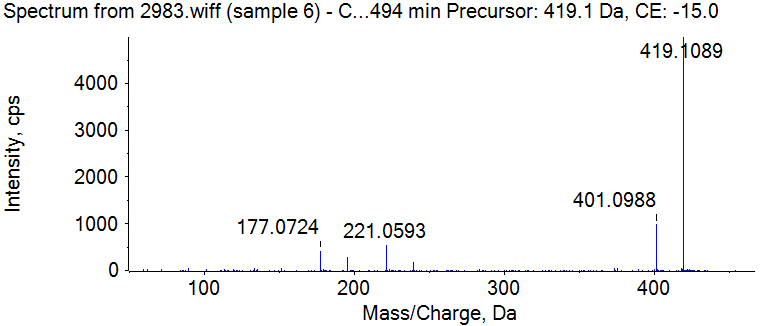


**Supplementary Figure S38.** Mass spectrum of Mangiferin


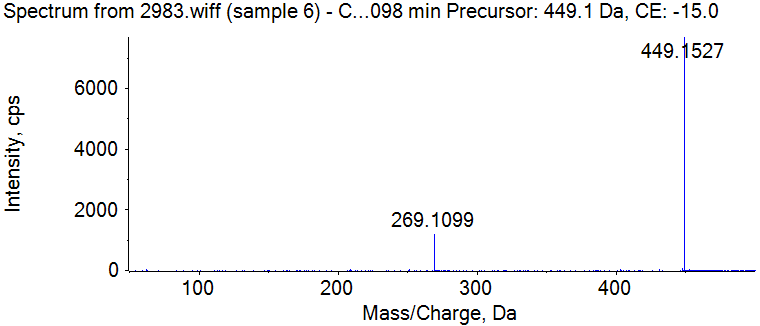


**Supplementary Figure S39.** Mass spectrum of kaempferol-3-O-glucoside


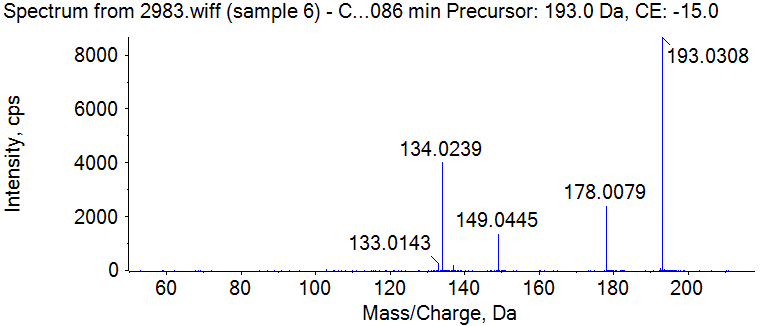


**Supplementary Figure S40.** Mass spectrum of ferulic acid


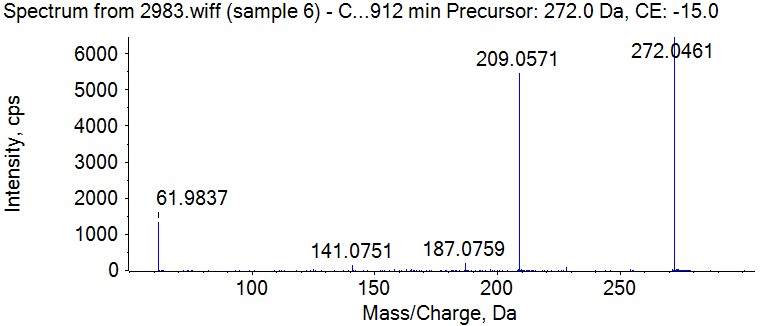


**Supplementary Figure S41.** Mass spectrum of Naringenin
